# Supplementary material
Source: publisher figshare collection journal article supplement (https://acs.figshare.com/ndownloader/files/4408771)
Supplement: Supplementary file 1 [file 4408771]

# **Combination of Scanning Electron Microscopy in the Characterization of a Nanometer-Sized Electrode and Current Fluctuation Observed at a Nanometer-Sized Electrode**

Isaac Agyekum, Christopher Nimley, Chenxi Yang and Peng Sun\*

Department of Chemistry, Box 70695, East Tennessee State University, Johnson City, TN 37614

E-mail: [sunp@etsu.edu](mailto:sunp@etsu.edu)

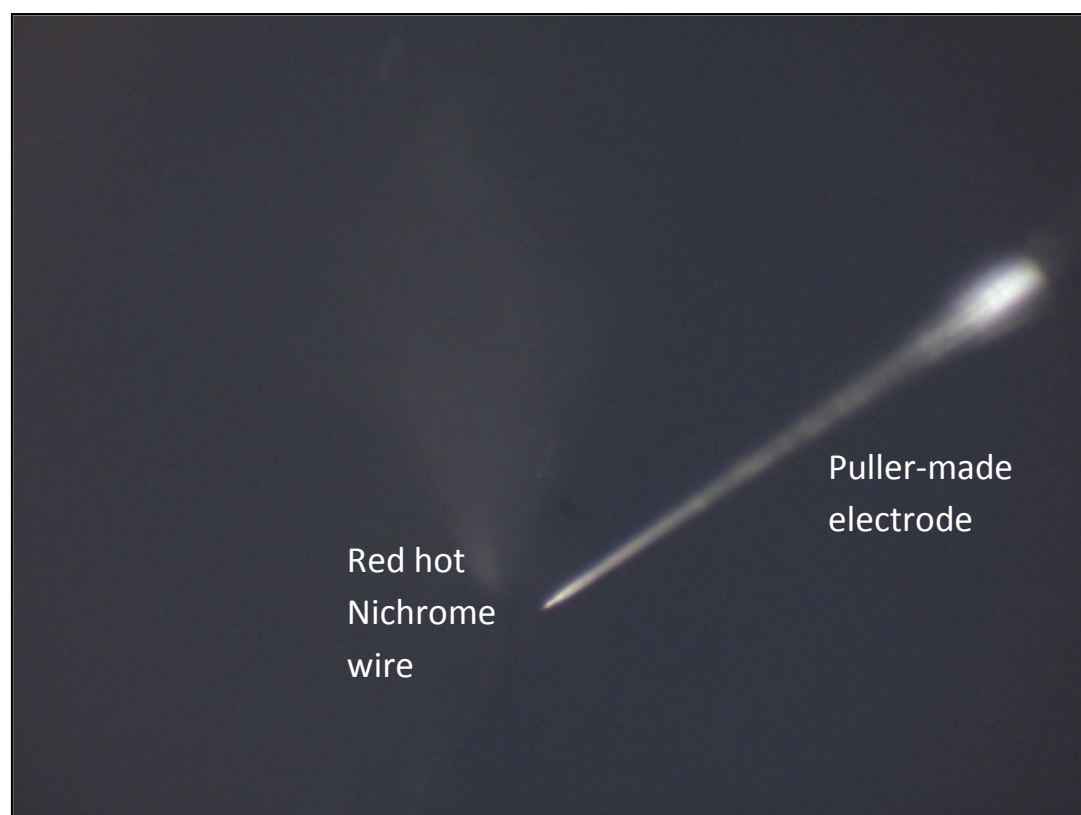

Figure S1: optical microscopy image of the setup used in local heating.

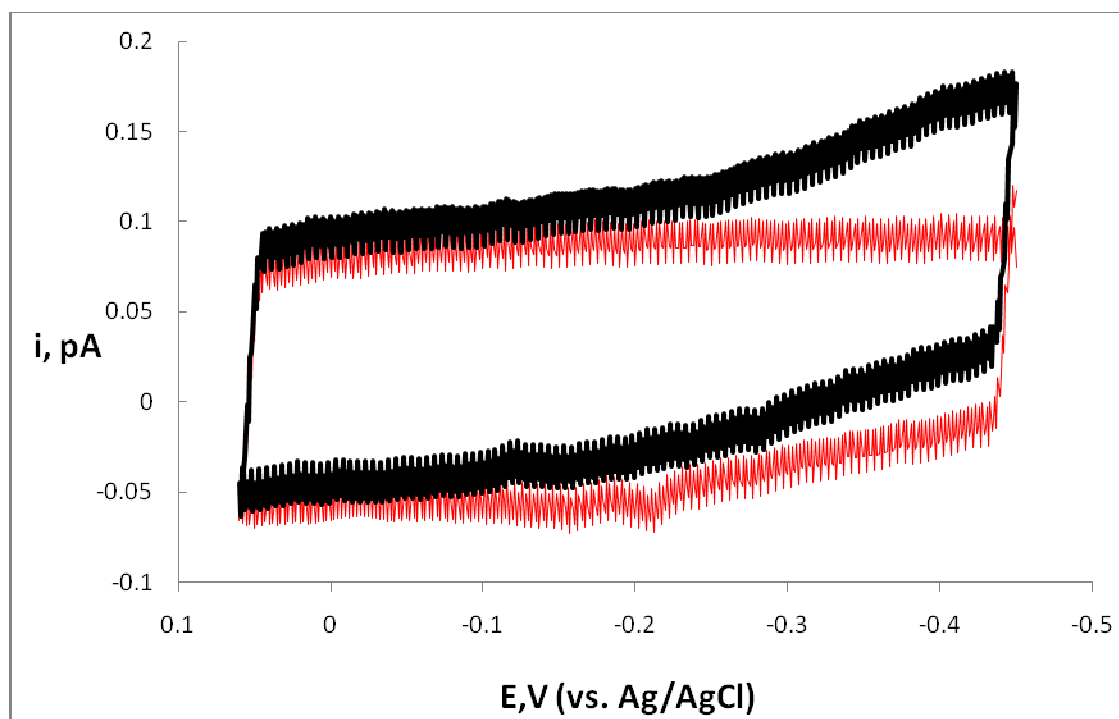

Figure S2: cyclic voltammograms obtained on a puller-made electrode after local heating in 10mM  $\text{Ru}(\text{NH}_3)_6\text{Cl}_3$  and 0.02 HF/water (V/V) aqueous solution. The red and black curve was obtained before and after the Pt wire is just exposed. The scan rate is 300mV/s.

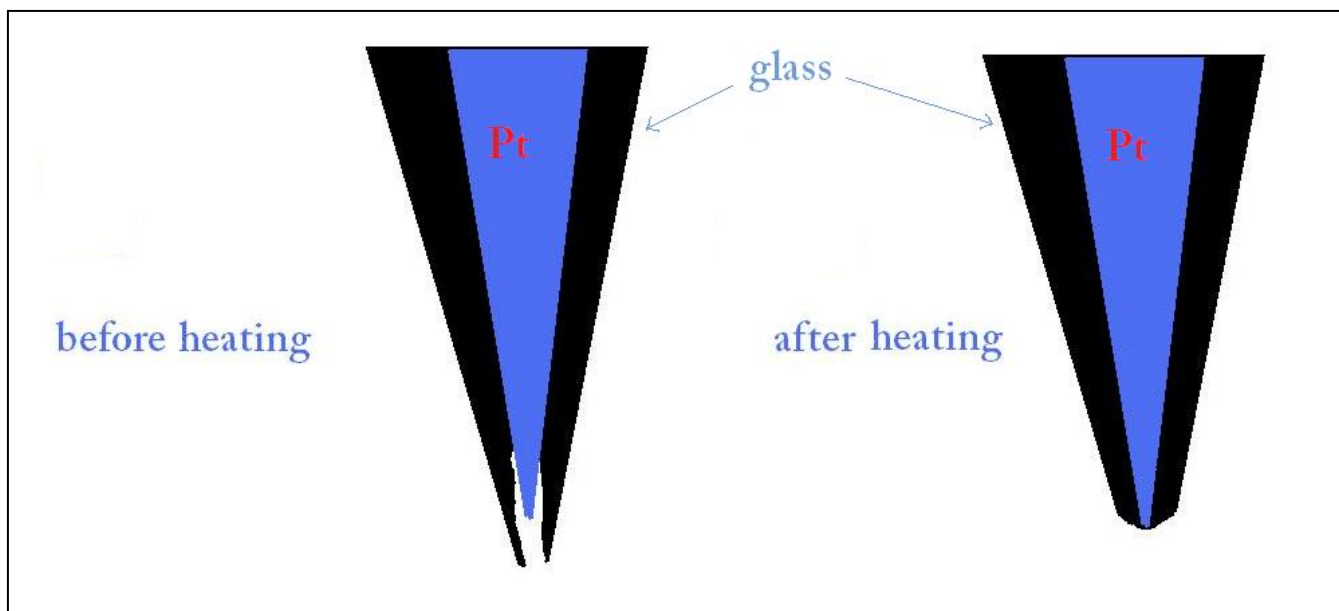

Figure s3: Schematic diagram of a puller made electrode before heating and after local heating.

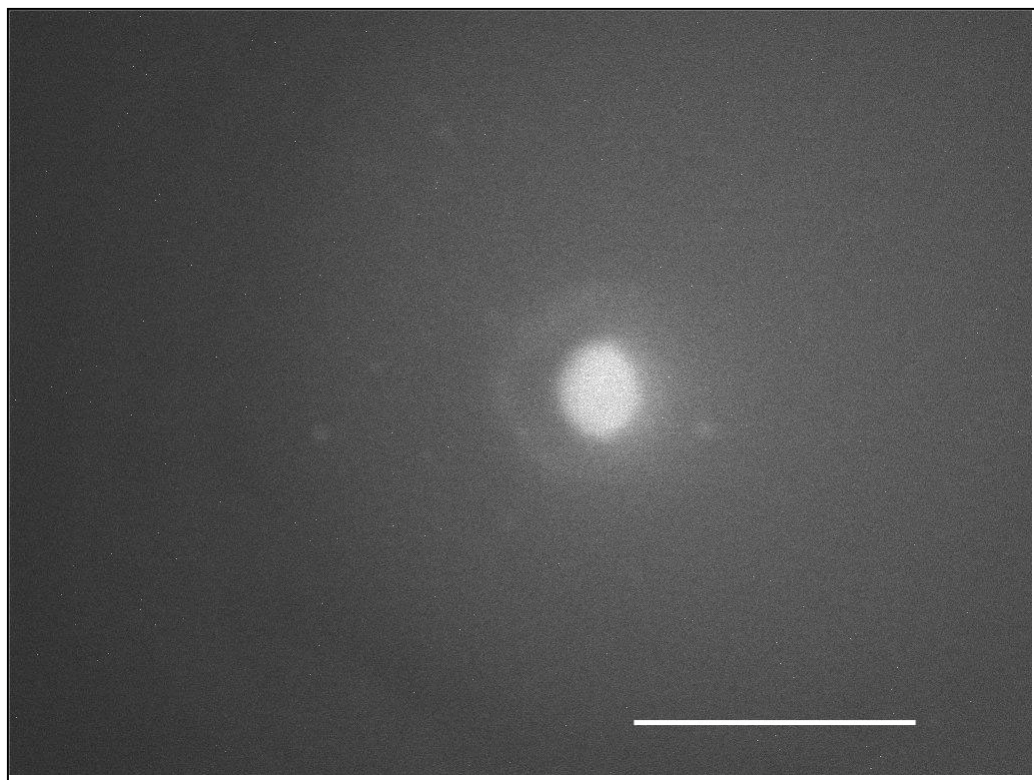

Figure s4A

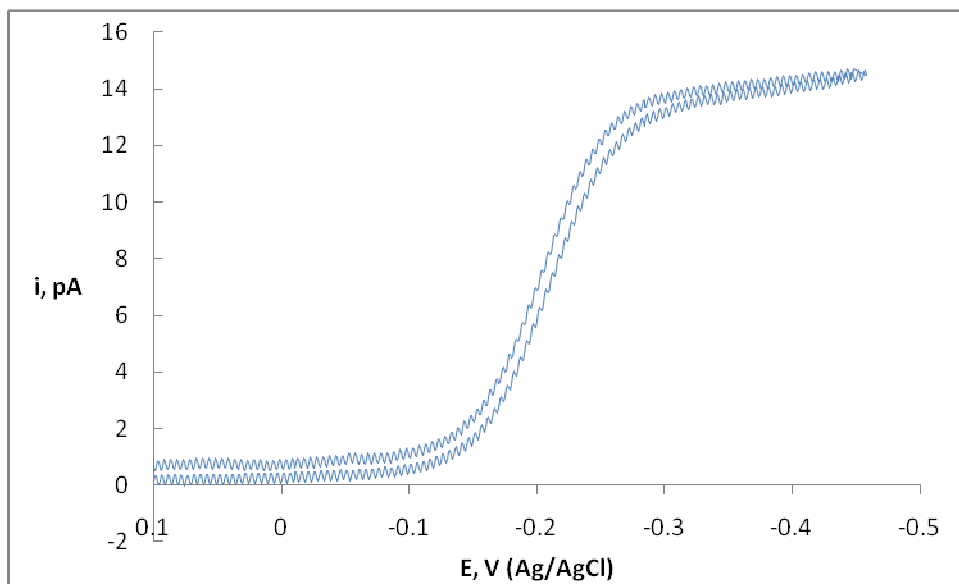

Figures s4B

Figure s4: A) Scanning electron microscopy images of a  $66.7 \pm 0.7$  nm in radius electrode. The scale bar in the picture is 500 nm. B) Cyclic voltammograms obtained on the electrode in Figure s3A in 1 mM  $\text{Ru}(\text{NH}_3)_6\text{Cl}_3$  and 0.2 M  $\text{KNO}_3$  aqueous solution. The scan rate is 100 mV/s. Its effective electrode radius calculated from equation 1 is  $63.2 \pm 1.6$  nm.
